# Supplementary material for: Virological, Serological and Clinical Analysis of Chikungunya Virus Infection in Thai Patients
Source: MDPI journal article supplement (doi:10.3390/v14081805), 2022-08-18
Supplement: s1 [file s1]

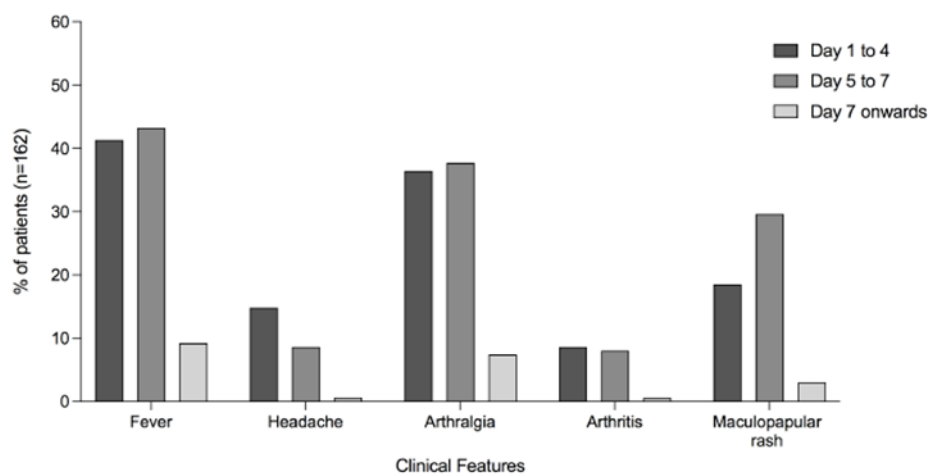

*S1 Fig. Onset of symptoms during the acute phase of CHIKV infection.*

**S1 Table: CHIKV primers used in present study.**

| Primers          | Region | Genome position | Sequence (5' → 3')                   |
|------------------|--------|-----------------|--------------------------------------|
| Standard RT-PCR  |        |                 |                                      |
| CHIKV F          | Nsp1   | 77-101          | GCATTAAGCTTATGGATCCTGTGTACGTGGACATAG |
| CHIKV R          |        | 1658-1681       | GCATTTC TAGATGCACCGCTCTGTCTCAAGCTG   |
| Real time RT-PCR |        |                 |                                      |
| CHIKV Probe      | Nsp1   | 201-224         | TCCGACGTCATCCTCTTGCTGGC              |
| CHIKV F          |        | 165-185         | TGATCCCGACTCAACCATCCT                |
| CHIKV R          |        | 226-247         | GGCAAACGCAGTGGTACTTCCT               |
| Sequencing       |        |                 |                                      |
| CHIKV 10123 F    | E1     | 10123-10139     | CGGCGCCTACTGCTTCTGCG                 |
| CHIKV 11287 R    |        | 11270-11287     | CGACACGCATAGCACCAC                   |
| CHIKV 10014 F    | E1     | 10014-10035     | CCCGAACACGGTGGGAGTACCG               |
| CHIKV 11227 R    |        | 11206-11227     | TCCCGTGATCTTCTGCACCCAT               |

**S2 Table: CHIKV sequences used in present study.**

| <b>Strain</b> | <b>Genotype</b> | <b>Country</b> | <b>Accession Number</b> |
|---------------|-----------------|----------------|-------------------------|
| TM073         | ECSA            | Thailand       | ON406423                |
| TM217         | ECSA            | Thailand       | ON406424                |
| TM155         | ECSA            | Thailand       | ON406425                |
| TM009         | ECSA            | Thailand       | ON406426                |
| TM248         | ECSA            | Thailand       | ON406427                |
| TM004         | ECSA            | Thailand       | ON406428                |
| TM007         | ECSA            | Thailand       | ON406429                |
| TM008         | ECSA            | Thailand       | ON406430                |
| TM015         | ECSA            | Thailand       | ON406431                |
| TM025         | ECSA            | Thailand       | ON406432                |
| TM026         | ECSA            | Thailand       | ON406433                |
| TM033         | ECSA            | Thailand       | ON406434                |
| TM198         | ECSA            | Thailand       | ON406435                |
